# Supplementary material for: Cancer-Associated Fibroblasts Promote Immunosuppression by Inducing ROS-Generating Monocytic MDSCs in Lung Squamous Cell Carcinoma
Source: Oxford University Press journal article supplement (doi:10.1158/2326-6066.cir-19-0507), 2020-02-19
Supplement: 23266066cir190507-sup-225117_2_supp_6002022_q5nt10.xlsx [file 23266066cir190507-sup-225117_2_supp_6002022_q5nt10.xlsx]

## Sheet: Sheet1
Table S1. Clinical features of primary lung squamous carcinoma cohort
Patient characteristics:
Age
Median	65.5
Range	54-82
Sex - no. patients (%)
Female	7 (58)
Male	5 (42)
Stage - no. (%)
Stage IA	3 (25)
Stage IB	5 (42)
Stage IIA/B	4 (33)
Smoking status - no. (%)
Never Smoker	0 (0)
Current	3 (25)
Former	9 (75)
Previous systemic therapies- no. (%)
Prior therapy	2 (17)
No therapy	10 (83)
Patient cohort A: IMC analysis
Age	Sex	Site	AJCC/UICC Stage	AJCC/UICC Stage Group	Histology	Ethnicity	Smoking Status	Prior chemo
78	F	Primary	T1aN0	IA	LSCC	Caucasian	Current	Chemotherapy
54	F	Primary	T2aN0	IB	LSCC	Caucasian	Current	none
63	M	Primary	T2aN0	IB	LSCC	Caucasian	Former	none
66	F	Primary	T1bN0	IA	LSCC	Caucasian	Former	none
76	M	Primary	T1bN0	IA	LSCC	Caucasian	Former	none
74	F	Primary	T2bN0	IIA	LSCC	Caucasian	Former	none
65	F	Primary	T2aN0	IB	LSCC	Caucasian	Current	none
60	F	Primary	T2aN1	IIB	LSCC	Caucasian	Former	none
63	M	Primary	T2aN0	IB	LSCC	Caucasian	Former	Platinol
59	F	Primary	T3N0	IIB	LSCC	Caucasian	Former	none
Patient cohort B: Generation of CAFs
ID	Age	Sex	Site	AJCC/UICC Stage	AJCC/UICC Stage Group	Histology	Ethnicity	Smoking Status	Prior chemo
CAF_02	82	M	Primary	T3N0	IIB	LSCC	Caucasian	Former	none
CAF_03	70	M	Primary	T2aN0	IB	LSCC	Caucasian	Former	none
