# Supplementary material for: Cancer-Associated Fibroblasts Promote Immunosuppression by Inducing ROS-Generating Monocytic MDSCs in Lung Squamous Cell Carcinoma
Source: Oxford University Press journal article supplement (doi:10.1158/2326-6066.cir-19-0507), 2020-02-19
Supplement: 23266066cir190507-sup-225117_2_supp_6002023_q3nm16.xlsx [file 23266066cir190507-sup-225117_2_supp_6002023_q3nm16.xlsx]

## Sheet: Sheet1
Table S2. The IMC antibody list
Species	Target	Metal	Clone	Manufacturer	Dilution
Human	a-SMA	141Pr	1A4	Fludigm	1:100
Human	vimentin	143Nd	D21H3	Fludigm	1:100
Human	CD14	144Nd	EPR3653	Fludigm	1:150
Human	CD33	145Nd	Polyclonal	Fludigm	1:100
Human	CD16	146 Nd	EPR16784	Fludigm	1:150
Human	CD15	149Sm	W6D3	Fludigm	1:100
Human	CD31	151Eu	EPR3094	Fludigm	1:100
Human	CD146	155Gd	EPR3208	Abcam	1:100
Human	CD4	156Gd	EPR6855	Fludigm	1:150
Human	Ecadherin	158Gd	24E10	Fludigm	1:100
Human	CD68	159Tb	KP1	Fludigm	1:150
Human	CD20	161Dy	H1	Fludigm	1:150
Human	CD8a	162Dy	C8/144B	Fludigm	1:150
Human	FAP	165Ho	Polyclonal	Thermo	1:100
Human	collagen I	169Tm	Polyclonal	Fludigm	1:100
Human	CD3	170Er	Polyclonal	Fludigm	1:100
Human	THY1	175Lu	EPR3132	Abcam	1:100
